# Supplementary material for: Risk of colorectal cancer in first degree relatives of patients with colorectal polyps: nationwide case-control study in Sweden
Source: PubMed Central journal article supplement (PMC8083372; doi:10.1136/bmj.n877), 2021-05-04
Supplement: sonm063617.ww.pdf [file sonm063617.ww.pdf]

## **Supplementary Materials**

**Supplementary Methods** - **Assessment of covariates**

**Supplementary Figure 1.** Flowchart of participant selection

**Supplementary Table 1.** SNOMED codes used to identify patients with colorectal cancer

**Supplementary Table 2.** Risk of colorectal cancer according to number of FDRs with a positive history of different histological subtypes of polyps

**Supplementary Table 3.** Risk of colorectal cancer according to the youngest age of diagnosis in FDRs for different histological subtypes of polyps

**Supplementary Table 4.** Association between family history of polyps in FDRs and risk of colorectal cancer according to cancer subsites

**Supplementary Table 5.** Stratified association between family history of any polyps in FDRs and risk of colorectal cancer

**Supplementary Table 6.** Joint association of history of polyps and colorectal cancer (CRC) in first-degree relatives (FDRs) with risk of overall CRC and early-onset CRC (diagnosed before the age of 50 years).

**Supplementary Table 7.** Summary of results of sensitivity analyses for assessing the association between family history of any polyps and risk of colorectal cancer (CRC)

**Supplementary Table 8.** Prevalence of common diseases diagnosed in individuals with and without a family history of polyps among the control group

## Supplementary Methods

### Assessment of covariates

For each participant, we calculated the family size as the sum of the number of parents and siblings. We obtained data on education and income from the longitudinal integrated database for health insurance and labor market studies,<sup>1</sup> which integrates annually updated administrative information from the labor market and educational and social sectors from 1990 onward on all individuals 16 years or older registered as residents in Sweden. We used the education and income data closest to the time of CRC diagnosis for both cases and their matched controls. Information on age, sex, date of birth, and emigration status was collected from the Swedish Total Population Register maintained by Statistics Sweden.

We collected information on use of endoscopic examination from the Swedish National Patient Registry, which started in 1964 with complete national coverage from 1987. We used the established procedure codes to identify colonoscopy (9011, 9023, 4688, 4689, 4674, 4684, UJF32, and UJF35) and sigmoidoscopy (9012, 4685, UJF42, and UJF45).<sup>2</sup> We counted the number of endoscopies performed before CRC diagnosis for cases and their matched controls. To avoid counting the diagnostic endoscopies for CRC, we excluded endoscopies performed within 30 days before the date of CRC diagnosis. We calculated the Charlson comorbidity score using the SAS® macro code developed by Turner and Burchill<sup>3</sup> based on the established ICD-9 and ICD-10 coding algorithms for 17 comorbidities,<sup>4,5</sup> including diabetes that has been linked to higher CRC risk. We also calculated the total number of prior clinic visits before CRC diagnosis for cases and their matched controls using the inpatient and outpatient records.

## References

1. Ludvigsson JF, Svedberg P, Olen O, et al. The longitudinal integrated database for health insurance and labour market studies (LISA) and its use in medical research. *Eur J Epidemiol* 2019;34(4):423-37. doi: 10.1007/s10654-019-00511-8 [published Online First: 2019/04/01]
2. Ludvigsson JF, Lebowitz B, Ekblom A, et al. Outcomes of Pregnancies for Women Undergoing Endoscopy While They Were Pregnant: A Nationwide Cohort Study. *Gastroenterology* 2017;152(3):554-63 e9. doi: 10.1053/j.gastro.2016.10.016 [published Online First: 2016/10/25]
3. Turner K, Burchill C. SAS® macro code for %CharlsonICD10 2006 [Available from: <http://mchp-appserv.cpe.umanitoba.ca/Upload/SAS/CharlsonICD10.sas.txt>].
4. Quan H, Sundararajan V, Halfon P, et al. Coding algorithms for defining comorbidities in ICD-9-CM and ICD-10 administrative data. *Med Care* 2005;43(11):1130-9. doi: 10.1097/01.mlr.0000182534.19832.83 [published Online First: 2005/10/15]
5. Charlson ME, Pompei P, Ales KL, et al. A new method of classifying prognostic comorbidity in longitudinal studies: development and validation. *J Chronic Dis* 1987;40(5):373-83. doi: 10.1016/0021-9681(87)90171-8 [published Online First: 1987/01/01]

**Supplementary Figure 1.** Flowchart of participant selection. Abbreviations: ESPRESSO, Epidemiology Strengthened by histoPathology Reports in Sweden.

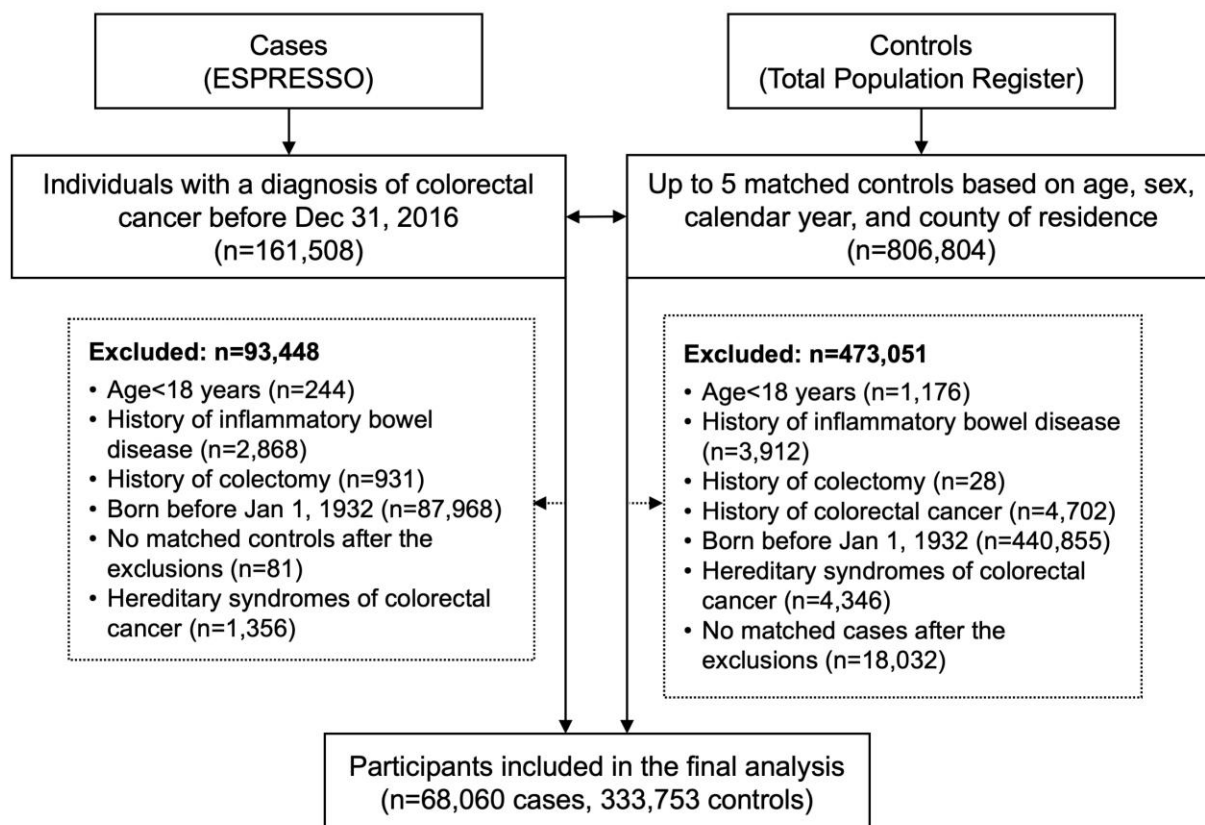

**Supplementary Table 1.** SNOMED codes used to identify patients with colorectal cancer (CRC)

| SNOMED code | Description                      |
|-------------|----------------------------------|
| M81401      | Adenocarcinoma - suspected       |
| M81402      | Adenocarcinoma - in situ         |
| M81403      | Adenocarcinoma                   |
| M81404      | Adenocarcinoma, overgrowth       |
| M81406      | Metastasis from adenocarcinoma   |
| M81407      | Recurrence of adenocarcinoma     |
| M81409      | Primary adenocarcinoma           |
| M81423      | Colonic linitis plastica         |
| M81443      | Adenocarcinoma - intestinal type |
| M81453      | Adenocarcinoma - diffuse type    |

**Supplementary Table 2.** Risk of colorectal cancer according to number of FDRs with a positive history of different histological subtypes of polyps

| Polyp types in FDRs                 | 0              | 1                | ≥2                | <i>P</i> <sub>trend</sub> |
|-------------------------------------|----------------|------------------|-------------------|---------------------------|
| <b>Hyperplastic polyps</b>          |                |                  |                   |                           |
| No. of cases (%)                    | 66,393 (97.6)  | 1,606 (2.4)      | 61 (0.1)          |                           |
| No. of controls (%)                 | 327,639 (98.2) | 5,922 (1.8)      | 192 (0.1)         |                           |
| Multivariable-adjusted OR (95% CI)* | 1 (Ref)        | 1.23 (1.16-1.31) | 1.22 (0.90-1.67)  | <.0001                    |
| <b>Sessile serrated polyps</b>      |                |                  |                   |                           |
| No. of cases (%)                    | 67,937 (99.8)  | 123 (0.2)        | 0 (0.0)           |                           |
| No. of controls (%)                 | 333,316 (99.9) | 437 (0.1)        | 0 (0.0)           |                           |
| Multivariable-adjusted OR (95% CI)* | 1 (Ref)        | 1.27 (1.03-1.57) | -                 | 0.03                      |
| <b>Tubular adenomas</b>             |                |                  |                   |                           |
| No. of cases (%)                    | 65,602 (96.4)  | 2,332 (3.4)      | 126 (0.2)         |                           |
| No. of controls (%)                 | 325,970 (97.7) | 7,531 (2.3)      | 252 (0.1)         |                           |
| Multivariable-adjusted OR (95% CI)* | 1 (Ref)        | 1.37 (1.31-1.45) | 1.89 (1.50-2.38)  | <.0001                    |
| <b>Tubulovillous adenomas</b>       |                |                  |                   |                           |
| No. of cases (%)                    | 66,204 (97.3)  | 1,814 (2.7)      | 42 (0.1)          |                           |
| No. of controls (%)                 | 328,316 (98.4) | 5,324 (1.6)      | 113 (0.0)         |                           |
| Multivariable-adjusted OR (95% CI)* | 1 (Ref)        | 1.45 (1.36-1.53) | 1.16 (0.79-1.69)  | <.0001                    |
| <b>Villous adenomas</b>             |                |                  |                   |                           |
| No. of cases (%)                    | 67,808 (99.6)  | 251 (0.4)        | 1 (0.0)           |                           |
| No. of controls (%)                 | 333,056 (99.8) | 696 (0.2)        | 1 (0.0)           |                           |
| Multivariable-adjusted OR (95% CI)* | 1 (Ref)        | 1.40 (1.20-1.63) | 1.48 (0.09-23.75) | <.0001                    |

Abbreviations: CI, confidence interval; FDR, first-degree relative; OR, odds ratio.

\*Multivariable conditional logistic regression was used to account for the matching on age, sex, year of birth, and county of residence, and was further adjusted for the number of FDRs with a history of CRC (continuous), year of birth (continuous), family size (continuous), income levels (quintiles), education (9 years or less, 10-12 years, >12 years, missing), total number of prior clinic visits (quintiles), number of prior endoscopies (0, 1, 2, ≥3), Charlson comorbidity score (continuous), and major comorbidities (all binary, including diabetes, cardiovascular disease, non-colorectal cancer, liver disease, chronic pulmonary disease, connective tissue disease, and peptic ulcer disease).

**Supplementary Table 3.** Risk of colorectal cancer according to the youngest age of diagnosis in FDRs for different histological subtypes of polyps

| Polyp types in FDRs            | ≥70 years        | 60-69 years      | 50-59 years      | <50 years        | <i>P</i> <sub>trend</sub> |
|--------------------------------|------------------|------------------|------------------|------------------|---------------------------|
| <b>Hyperplastic polyps</b>     |                  |                  |                  |                  |                           |
| No. of cases (%)               | 503 (0.7)        | 572 (0.8)        | 427 (0.6)        | 165 (0.2)        |                           |
| No. of controls (%)            | 1,975 (0.6)      | 2,132 (0.6)      | 1,445 (0.4)      | 562 (0.2)        |                           |
| OR (95% CI)*                   | 1.12 (1.01-1.25) | 1.22 (1.11-1.35) | 1.37 (1.22-1.53) | 1.36 (1.13-1.63) | <.0001                    |
| <b>Sessile serrated polyps</b> |                  |                  |                  |                  |                           |
| No. of cases (%)               | 43 (0.1)         | 47 (0.1)         | 28 (0.0)         | 5 (0.0)          |                           |
| No. of controls (%)            | 164 (0.0)        | 157 (0.0)        | 85 (0.0)         | 31 (0.0)         |                           |
| OR (95% CI)*                   | 1.06 (0.75-1.51) | 1.39 (0.98-1.96) | 1.68 (1.08-2.61) | 0.80 (0.30-2.16) | 0.02                      |
| <b>Tubular adenomas</b>        |                  |                  |                  |                  |                           |
| No. of cases (%)               | 1,047 (1.5)      | 791 (1.2)        | 422 (0.6)        | 198 (0.3)        |                           |
| No. of controls (%)            | 3,591 (1.1)      | 2,388 (0.7)      | 1,361 (0.4)      | 443 (0.1)        |                           |
| OR (95% CI)*                   | 1.24 (1.16-1.34) | 1.51 (1.39-1.65) | 1.40 (1.24-1.57) | 1.94 (1.62-2.32) | <.0001                    |
| <b>Tubulovillous adenomas</b>  |                  |                  |                  |                  |                           |
| No. of cases (%)               | 908 (1.3)        | 537 (0.8)        | 313 (0.5)        | 98 (0.1)         |                           |
| No. of controls (%)            | 2,894 (0.9)      | 1,500 (0.4)      | 844 (0.3)        | 199 (0.1)        |                           |
| OR (95% CI)*                   | 1.32 (1.22-1.43) | 1.50 (1.35-1.66) | 1.58 (1.38-1.82) | 2.22 (1.71-2.87) | <.0001                    |
| <b>Villous adenomas</b>        |                  |                  |                  |                  |                           |
| No. of cases (%)               | 136 (0.2)        | 65 (0.1)         | 33 (0.0)         | 18 (0.0)         |                           |
| No. of controls (%)            | 437 (0.1)        | 153 (0.0)        | 77 (0.0)         | 30 (0.0)         |                           |
| OR (95% CI)*                   | 1.18 (0.96-1.44) | 1.69 (1.24-2.30) | 1.84 (1.20-2.81) | 2.06 (1.09-3.91) | <.0001                    |

Abbreviations: CI, confidence interval; FDR, first-degree relative; OR, odds ratio.

\*Multivariable conditional logistic regression was used to account for the matching on age, sex, year of birth, and county of residence, and was further adjusted for the number of FDRs with a history of CRC (continuous), year of birth (continuous), family size (continuous), income levels (quintiles), education (9 years or less, 10-12 years, >12 years, missing), total number of prior clinic visits (quintiles), number of prior endoscopies (0, 1, 2, ≥3), Charlson comorbidity score (continuous), and major comorbidities (all binary, including diabetes, cardiovascular disease, non-colorectal cancer, liver disease, chronic pulmonary disease, connective tissue disease, and peptic ulcer disease).

**Supplementary Table 4.** Association between family history of polyps in FDRs and risk of colorectal cancer according to cancer subsites\*

| No. of FDRs with different polyp subtypes | Proximal colon cancer |                  | Distal colon cancer |                  | Rectal cancer |                  | <i>P</i> <sub>heterogeneity</sub> by cancer subsite‡ |
|-------------------------------------------|-----------------------|------------------|---------------------|------------------|---------------|------------------|------------------------------------------------------|
|                                           | No. of cases          | OR (95% CI)†     | No. of cases        | OR (95% CI)†     | No. of cases  | OR (95% CI)†     |                                                      |
| <b>Any polyps</b>                         |                       |                  |                     |                  |               |                  |                                                      |
| 0                                         | 4,999                 | 1 (Ref)          | 6,014               | 1 (Ref)          | 21,984        | 1 (Ref)          | 0.99                                                 |
| 1                                         | 443                   | 1.39 (1.23-1.58) | 564                 | 1.40 (1.26-1.57) | 1,804         | 1.39 (1.31-1.47) |                                                      |
| ≥2                                        | 49                    | 1.85 (1.23-2.77) | 60                  | 1.68 (1.20-2.35) | 169           | 1.79 (1.48-2.16) |                                                      |
| <i>P</i> for trend                        |                       | <.0001           |                     | <.0001           |               | <.0001           |                                                      |
| <b>Conventional adenomas</b>              |                       |                  |                     |                  |               |                  |                                                      |
| 0                                         | 5,126                 | 1 (Ref)          | 6,178               | 1 (Ref)          | 22,472        | 1 (Ref)          | 0.77                                                 |
| 1                                         | 340                   | 1.47 (1.27-1.70) | 426                 | 1.41 (1.24-1.59) | 1,392         | 1.47 (1.38-1.57) |                                                      |
| ≥2                                        | 25                    | 1.78 (1.02-3.12) | 34                  | 1.69 (1.09-2.64) | 93            | 1.82 (1.41-2.34) |                                                      |
| <i>P</i> for trend                        |                       | <.0001           |                     | <.0001           |               | <.0001           |                                                      |
| <b>Serrated polyps</b>                    |                       |                  |                     |                  |               |                  |                                                      |
| 0                                         | 5,320                 | 1 (Ref)          | 6,445               | 1 (Ref)          | 23,385        | 1 (Ref)          | 0.67                                                 |
| 1                                         | 160                   | 1.23 (1.01-1.50) | 186                 | 1.31 (1.10-1.57) | 553           | 1.21 (1.09-1.33) |                                                      |
| ≥2                                        | 11                    | 2.53 (1.06-6.03) | 7                   | 0.96 (0.37-2.46) | 19            | 1.14 (0.68-1.92) |                                                      |
| <i>P</i> for trend                        |                       | 0.007            |                     | 0.006            |               | 0.0003           |                                                      |

Abbreviations: CI, confidence interval; FDR, first-degree relative; OR, odds ratio.

\*Colon cases with no specified sublocation (n=32,616, 47.0%) were not included in the analysis.

†Multivariable conditional logistic regression was used to account for the matching on age, sex, year of birth, and county of residence, and was further adjusted for the number of FDRs with a history of CRC (continuous), year of birth (continuous), family size (continuous), income levels (quintiles), education (9 years or less, 10-12 years, >12 years, missing), total number of prior clinic visits (quintiles), number of prior endoscopies (0, 1, 2, ≥3), Charlson comorbidity score (continuous), and major comorbidities (all binary, including diabetes, cardiovascular disease, non-colorectal cancer, liver disease, chronic pulmonary disease, connective tissue disease, and peptic ulcer disease).

‡*P*<sub>heterogeneity</sub> was calculated using the contrast test method.



**Supplementary Table 5.** Stratified association between family history of any polyps in FDRs and risk of colorectal cancer (CRC)

|                          | No. of FDRs with any polyps |                  |                  | <i>P</i> <sub>trend</sub> | <i>P</i> <sub>interaction</sub> |
|--------------------------|-----------------------------|------------------|------------------|---------------------------|---------------------------------|
|                          | 0                           | 1                | ≥2               |                           |                                 |
| By sex                   |                             |                  |                  |                           | 0.94                            |
| Men                      |                             |                  |                  |                           |                                 |
| No. of cases (%)         | 33,474 (91.5)               | 2,830 (7.7)      | 292 (0.8)        |                           |                                 |
| OR (95% CI)*             | 1 (Ref)                     | 1.30 (1.24-1.36) | 1.59 (1.37-1.85) | <.0001                    |                                 |
| Women                    |                             |                  |                  |                           |                                 |
| No. of cases (%)         | 28,844 (91.7)               | 2,390 (7.6)      | 230 (0.7)        |                           |                                 |
| OR (95% CI)*             | 1 (Ref)                     | 1.33 (1.27-1.41) | 1.48 (1.25-1.75) | <.0001                    |                                 |
| By relationship of FDRs  |                             |                  |                  |                           | 0.04                            |
| Parents                  |                             |                  |                  |                           |                                 |
| No. of cases (%)         | 64,913 (95.4)               | 3,062 (4.5)      | 85 (0.1)         |                           |                                 |
| OR (95% CI)*             | 1 (Ref)                     | 1.35 (1.29-1.41) | 1.32 (1.02-1.72) | <.0001                    |                                 |
| Sibling                  |                             |                  |                  |                           |                                 |
| No. of cases (%)         | 65,231 (95.8)               | 2,593 (3.8)      | 236 (0.3)        |                           |                                 |
| OR (95% CI)*             | 1 (Ref)                     | 1.27 (1.21-1.33) | 1.39 (1.18-1.64) | <.0001                    |                                 |
| By year of birth         |                             |                  |                  |                           | 0.01                            |
| <1940                    |                             |                  |                  |                           |                                 |
| No. of cases (%)         | 26,750 (94.7)               | 1,367 (4.8)      | 117 (0.4)        |                           |                                 |
| OR (95% CI)*             | 1 (Ref)                     | 1.32 (1.24-1.41) | 1.27 (1.01-1.59) | <.0001                    |                                 |
| ≥1940, <1950             |                             |                  |                  |                           |                                 |
| No. of cases (%)         | 23,062 (90.3)               | 2,224 (8.7)      | 243 (1.0)        |                           |                                 |
| OR (95% CI)*             | 1 (Ref)                     | 1.28 (1.21-1.35) | 1.60 (1.36-1.88) | <.0001                    |                                 |
| ≥1950                    |                             |                  |                  |                           |                                 |
| No. of cases (%)         | 12,506 (87.5)               | 1,629 (11.4)     | 162 (1.1)        |                           |                                 |
| OR (95% CI)*             | 1 (Ref)                     | 1.34 (1.26-1.43) | 1.72 (1.40-2.12) | <.0001                    |                                 |
| By year of CRC diagnosis |                             |                  |                  |                           | 0.003†                          |
| <2008                    |                             |                  |                  |                           |                                 |
| No. of cases (%)         | 29,957 (94.6)               | 1,592 (5.0)      | 116 (0.4)        |                           |                                 |
| OR (95% CI)*             | 1 (Ref)                     | 1.46 (1.37-1.56) | 2.22 (1.73-2.86) | <.0001                    |                                 |
| ≥2008, <2012             |                             |                  |                  |                           |                                 |
| No. of cases (%)         | 14,186 (90.4)               | 1,382 (8.8)      | 128 (0.8)        |                           |                                 |
| OR (95% CI)*             | 1 (Ref)                     | 1.34 (1.25-1.44) | 1.53 (1.22-1.91) | <.0001                    |                                 |
| ≥2012                    |                             |                  |                  |                           |                                 |
| No. of cases (%)         | 18,175 (87.8)               | 2,246 (10.9)     | 278 (1.3)        |                           |                                 |
| OR (95% CI)*             | 1 (Ref)                     | 1.32 (1.25-1.40) | 1.56 (1.34-1.82) | <.0001                    |                                 |

Abbreviations: CI, confidence interval; FDR, first-degree relative; OR, odds ratio.

\*Multivariable conditional logistic regression was used to account for the matching on age, sex, year of birth, and county of residence, and was further adjusted for the number of FDRs with a history of CRC (continuous), year of birth (continuous), family size (continuous), income levels (quintiles), education (9 years or less, 10-12 years, >12 years, missing), total number of prior clinic visits (quintiles), number of prior endoscopies (0, 1, 2, ≥3), Charlson comorbidity score (continuous), and

major comorbidities (all binary, including diabetes, cardiovascular disease, non-colorectal cancer, liver disease, chronic pulmonary disease, connective tissue disease, and peptic ulcer disease).  
†This is  $P_{heterogeneity}$  calculated using the contrast test method.

**Supplementary Table 6.** Joint association of history of polyps and colorectal cancer (CRC) in first-degree relatives (FDRs) with risk of overall CRC and early-onset CRC (diagnosed before the age of 50 years).

|                                                    | History of polyps<br>in FDRs | History of CRC<br>in FDRs | No. of cases<br>(%) | No. of controls<br>(%) | OR (95% CI)*       | <i>P</i> <sub>interaction</sub> |
|----------------------------------------------------|------------------------------|---------------------------|---------------------|------------------------|--------------------|---------------------------------|
| <b>Overall CRC</b>                                 |                              |                           |                     |                        |                    |                                 |
| By<br>number of<br>FDRs<br>with<br>polyps          | 0                            | 0                         | 56,997 (83.7)       | 298,097 (89.3)         | 1 (Ref)            | 0.0005                          |
|                                                    | 1                            | 0                         | 3,254 (4.8)         | 12,627 (3.8)           | 1.43 (1.38-1.50)   |                                 |
|                                                    | ≥2                           | 0                         | 221 (0.3)           | 676 (0.2)              | 1.79 (1.52-2.10)   |                                 |
|                                                    | 0                            | 1                         | 5,082 (7.5)         | 16,361 (4.9)           | 1.70 (1.65-1.76)   |                                 |
|                                                    | 1                            | 1                         | 1,775 (2.6)         | 4,651 (1.4)            | 2.16 (2.04-2.29)   |                                 |
|                                                    | ≥2                           | 1                         | 202 (0.3)           | 434 (0.1)              | 2.68 (2.24-3.20)   |                                 |
|                                                    | 0                            | ≥2                        | 239 (0.4)           | 435 (0.1)              | 3.14 (2.65-3.71)   |                                 |
|                                                    | 1                            | ≥2                        | 191 (0.3)           | 349 (0.1)              | 3.15 (2.61-3.81)   |                                 |
| ≥2                                                 | ≥2                           | 99 (0.1)                  | 123 (0.0)           | 5.00 (3.77-6.63)       |                    |                                 |
| By the<br>youngest<br>age at<br>polyp<br>diagnosis | No                           | No                        | 56,997 (83.7)       | 298,097 (89.3)         | 1 (Ref)            | 0.001                           |
|                                                    | ≥60 years                    | No                        | 2,504 (3.7)         | 9,789 (2.9)            | 1.42 (1.35-1.48)   |                                 |
|                                                    | <60 years                    | No                        | 971 (1.4)           | 3,514 (1.1)            | 1.55 (1.44-1.67)   |                                 |
|                                                    | No                           | ≥60 years                 | 4,126 (6.1)         | 13,896 (4.2)           | 1.63 (1.57-1.70)   |                                 |
|                                                    | ≥60 years                    | ≥60 years                 | 1,522 (2.2)         | 4,097 (1.2)            | 2.12 (1.99-2.25)   |                                 |
|                                                    | <60 years                    | ≥60 years                 | 224 (0.3)           | 477 (0.1)              | 2.70 (2.28-3.20)   |                                 |
|                                                    | No                           | <60 years                 | 1,195 (1.8)         | 2,900 (0.9)            | 2.24 (2.08-2.40)   |                                 |
|                                                    | ≥60 years                    | <60 years                 | 193 (0.3)           | 340 (0.1)              | 3.22 (2.67-3.89)   |                                 |
| <60 years                                          | <60 years                    | 328 (0.5)                 | 643 (0.2)           | 2.85 (2.48-3.29)       |                    |                                 |
| <b>Early-onset CRC</b>                             |                              |                           |                     |                        |                    |                                 |
| By<br>number of<br>FDRs<br>with<br>polyps          | 0                            | 0                         | 6,295 (85.4)        | 34,095 (93.0)          | 1 (Ref)            | 0.001                           |
|                                                    | 1                            | 0                         | 368 (5.0)           | 1,154 (3.1)            | 1.82 (1.59-2.08)   |                                 |
|                                                    | ≥2                           | 0                         | 20 (0.3)            | 29 (0.1)               | 3.97 (2.09-7.53)   |                                 |
|                                                    | 0                            | 1                         | 459 (6.2)           | 1,004 (2.7)            | 2.67 (2.36-3.03)   |                                 |
|                                                    | 1                            | 1                         | 170 (2.3)           | 340 (0.9)              | 3.03 (2.46-3.73)   |                                 |
|                                                    | ≥2                           | 1                         | 21 (0.3)            | 17 (0.0)               | 9.83 (4.63-20.90)  |                                 |
|                                                    | 0                            | ≥2                        | 22 (0.3)            | 10 (0.0)               | 12.10 (5.30-27.60) |                                 |
|                                                    | 1                            | ≥2                        | 6 (0.1)             | 15 (0.0)               | 2.60 (0.92-7.35)   |                                 |
| ≥2                                                 | ≥2                           | 11 (0.1)                  | 4 (0.0)             | 16.57 (4.81-57.13)     |                    |                                 |
| By the<br>youngest<br>age at<br>polyp<br>diagnosis | No                           | No                        | 6,295 (85.4)        | 34,095 (93.0)          | 1 (Ref)            | 0.29                            |
|                                                    | ≥60 years                    | No                        | 229 (3.1)           | 752 (2.1)              | 1.76 (1.49-2.08)   |                                 |
|                                                    | <60 years                    | No                        | 159 (2.2)           | 431 (1.2)              | 2.01 (1.64-2.46)   |                                 |
|                                                    | No                           | ≥60 years                 | 241 (3.3)           | 680 (1.9)              | 2.02 (1.72-2.38)   |                                 |
|                                                    | ≥60 years                    | ≥60 years                 | 104 (1.4)           | 272 (0.7)              | 2.26 (1.76-2.91)   |                                 |
|                                                    | <60 years                    | ≥60 years                 | 8 (0.1)             | 23 (0.1)               | 3.30 (1.40-7.76)   |                                 |
|                                                    | No                           | <60 years                 | 240 (3.3)           | 334 (0.9)              | 4.31 (3.58-5.19)   |                                 |
|                                                    | ≥60 years                    | <60 years                 | 17 (0.2)            | 19 (0.1)               | 6.08 (2.94-12.60)  |                                 |
| <60 years                                          | <60 years                    | 79 (1.1)                  | 62 (0.2)            | 7.90 (5.39-11.57)      |                    |                                 |

Abbreviations: CI, confidence interval; FDR, first-degree relative; OR, odds ratio.

\*Multivariable conditional logistic regression was used to account for the matching on age, sex, year of birth, and county of residence, and was further adjusted for year of birth (continuous),

family size (continuous), income levels (quintiles), education (9 years or less, 10-12 years, >12 years, missing), total number of prior clinic visits (quintiles), number of prior endoscopies (0, 1, 2,  $\geq 3$ ), Charlson comorbidity score (continuous), and major comorbidities (all binary, including diabetes, cardiovascular disease, non-colorectal cancer, liver disease, chronic pulmonary disease, connective tissue disease, and peptic ulcer disease).

**Supplementary Table 7.** Summary of results of sensitivity analyses for assessing the association between family history of any polyps and risk of colorectal cancer (CRC)

| Analysis                                                                                                  | Cases, n (%)  | Controls, n (%) | Multivariable-adjusted OR (95% CI)* | Multivariable + FH of CRC-adjusted OR (95% CI) † |
|-----------------------------------------------------------------------------------------------------------|---------------|-----------------|-------------------------------------|--------------------------------------------------|
| Using mortality of incidence CRC as the study outcome                                                     |               |                 |                                     |                                                  |
| Family history of any polyps                                                                              |               |                 |                                     |                                                  |
| No                                                                                                        | 17,803 (93.0) | 89,697 (95.1)   | 1 (Ref)                             | 1 (Ref)                                          |
| Yes                                                                                                       | 1,345 (7.0)   | 4,605 (4.9)     | 1.61 (1.50-1.73)                    | 1.40 (1.30-1.51)                                 |
| No. of FDRs with any polyps                                                                               |               |                 |                                     |                                                  |
| 0                                                                                                         | 17,803 (93.0) | 89,697 (95.1)   | 1 (Ref)                             | 1 (Ref)                                          |
| 1                                                                                                         | 1,236 (6.5)   | 4,333 (4.6)     | 1.58 (1.47-1.70)                    | 1.39 (1.29-1.50)                                 |
| ≥2                                                                                                        | 109 (0.6)     | 272 (0.3)       | 2.05 (1.59-2.66)                    | 1.55 (1.19-2.02)                                 |
| <i>P<sub>trend</sub></i>                                                                                  |               |                 | <.0001                              | <.0001                                           |
| Restricted to CRC cases diagnosed after 2008 and family history assessment to post-2008 in Stockholm only |               |                 |                                     |                                                  |
| Family history of any polyps                                                                              |               |                 |                                     |                                                  |
| No                                                                                                        | 36,132 (99.3) | 175,711 (99.5)  | 1 (Ref)                             | 1 (Ref)                                          |
| Yes                                                                                                       | 263 (0.7)     | 885 (0.5)       | 1.41 (1.22-1.62)                    | 1.24 (1.07-1.43)                                 |
| No. of FDRs with any polyps                                                                               |               |                 |                                     |                                                  |
| 0                                                                                                         | 36,132 (99.3) | 175,711 (99.5)  | 1 (Ref)                             | 1 (Ref)                                          |
| 1                                                                                                         | 255 (0.7)     | 870 (0.5)       | 1.39 (1.21-1.61)                    | 1.23 (1.06-1.42)                                 |
| ≥2                                                                                                        | 8 (0.0)       | 15 (0.0)        | 2.09 (0.86-5.07)                    | 1.67 (0.69-4.07)                                 |
| <i>P<sub>trend</sub></i>                                                                                  |               |                 | <.0001                              | <.0001                                           |

Abbreviations: CI, confidence interval; FDR, first-degree relative; FH, family history; OR, odds ratio.

\*Multivariable conditional logistic regression was used to account for the matching on age, sex, year of birth, and county of residence, and was further adjusted for year of birth (continuous), family size (continuous), income levels (quintiles), education (9 years or less, 10-12 years, >12 years, missing), total number of prior clinic visits (quintiles), number of prior endoscopies (0, 1, 2, ≥3), Charlson comorbidity score (continuous), and major comorbidities (all binary, including diabetes, cardiovascular disease, non-colorectal cancer, liver disease, chronic pulmonary disease, connective tissue disease, and peptic ulcer disease).

†Further adjusted for the number of FDRs with a history of CRC (continuous).

**Supplementary Table 8.** Prevalence of common diseases diagnosed in individuals with and without a family history of polyps among the control group

| Individual comorbidity, n (%)               | Negative family history of polyps (n=314,893) | Positive family history of polyps (n= 18,860) |
|---------------------------------------------|-----------------------------------------------|-----------------------------------------------|
| Myocardial Infarction                       | 15,931 (4.2)                                  | 941 (3.8)                                     |
| Congestive Heart Failure                    | 8,101 (2.2)                                   | 485 (2.0)                                     |
| Peripheral Vascular Disease                 | 6,369 (1.7)                                   | 464 (1.9)                                     |
| Cerebrovascular Disease                     | 19,581 (5.2)                                  | 1,307 (5.3)                                   |
| Dementia                                    | 2,481 (0.7)                                   | 149 (0.6)                                     |
| Chronic Pulmonary Disease                   | 18,462 (4.9)                                  | 1,415 (5.8)                                   |
| Connective Tissue Disease-Rheumatic Disease | 6,691 (1.8)                                   | 490 (2.0)                                     |
| Peptic Ulcer Disease                        | 4,629 (1.2)                                   | 364 (1.5)                                     |
| Mild Liver Disease                          | 2,425 (0.6)                                   | 181 (0.7)                                     |
| Diabetes without complications              | 17,870 (4.7)                                  | 1,207 (4.9)                                   |
| Diabetes with complications                 | 6,575 (1.7)                                   | 446 (1.8)                                     |
| Paraplegia and Hemiplegia                   | 1,466 (0.4)                                   | 124 (0.5)                                     |
| Renal Disease                               | 2,487 (0.7)                                   | 169 (0.7)                                     |
| Cancer*                                     | 30,789 (8.2)                                  | 2,435 (9.9)                                   |
| Moderate or Severe Liver Disease            | 693 (0.2)                                     | 54 (0.2)                                      |
| Metastatic Carcinoma of Unspecified Sites   | 3,665 (1.0)                                   | 297 (1.2)                                     |
| AIDS/HIV                                    | 168 (0.0)                                     | 6 (0.0)                                       |

\*Excluding colorectal cancer.
